# Supplementary material
Source: PubMed Central journal article supplement (PMC7506610)
Supplement: jamapediatr-e202991-s001.pdf [file jamapediatr-e202991-s001.pdf]

## Supplementary Online Content

El Marroun H, Zou R, Leeuwenburg MF, et al. Association of gestational age at birth with brain morphology. *JAMA Pediatr*. Published online September 21, 2020.  
doi:10.1001/jamapediatrics.2020.2991

**eFigure 1.** Flow Diagram

**eFigure 2.** Global Brain Volumes in Children Born Early Term, Full Term, and Late Term

**eFigure 3.** Linear Relationship Between Gestational Age at Birth and Total Brain Volumes in Children With Heatmap

**eFigure 4.** The Association of Gestational Age at Birth With Subcortical Gray Matter Volumes in Children

**eTable 1.** Gestational Age at Birth and Cortical Morphology at 10 Years: Interaction of GA With Sex

**eTable 2.** Gestational Age at Birth and Cortical Morphology at 10 Years: Surface-Based Clusters in All Children

**eTable 3.** Gestational Age at Birth and Cortical Morphology at 10 Years: Surface-Based Clusters in Children Born at Term

**eTable 4.** Comparison of Linear and Nonlinear (Quadratic and Natural Cubic Spline) Models Using The Likelihood Ratio Test

**eTable 5.** The Association of Gestational Age at Birth in Categories With Global Brain Volumes

**eTable 6.** Nonresponse Analysis

This supplementary material has been provided by the authors to give readers additional information about their work.

**eFigure 1. Flow Diagram**

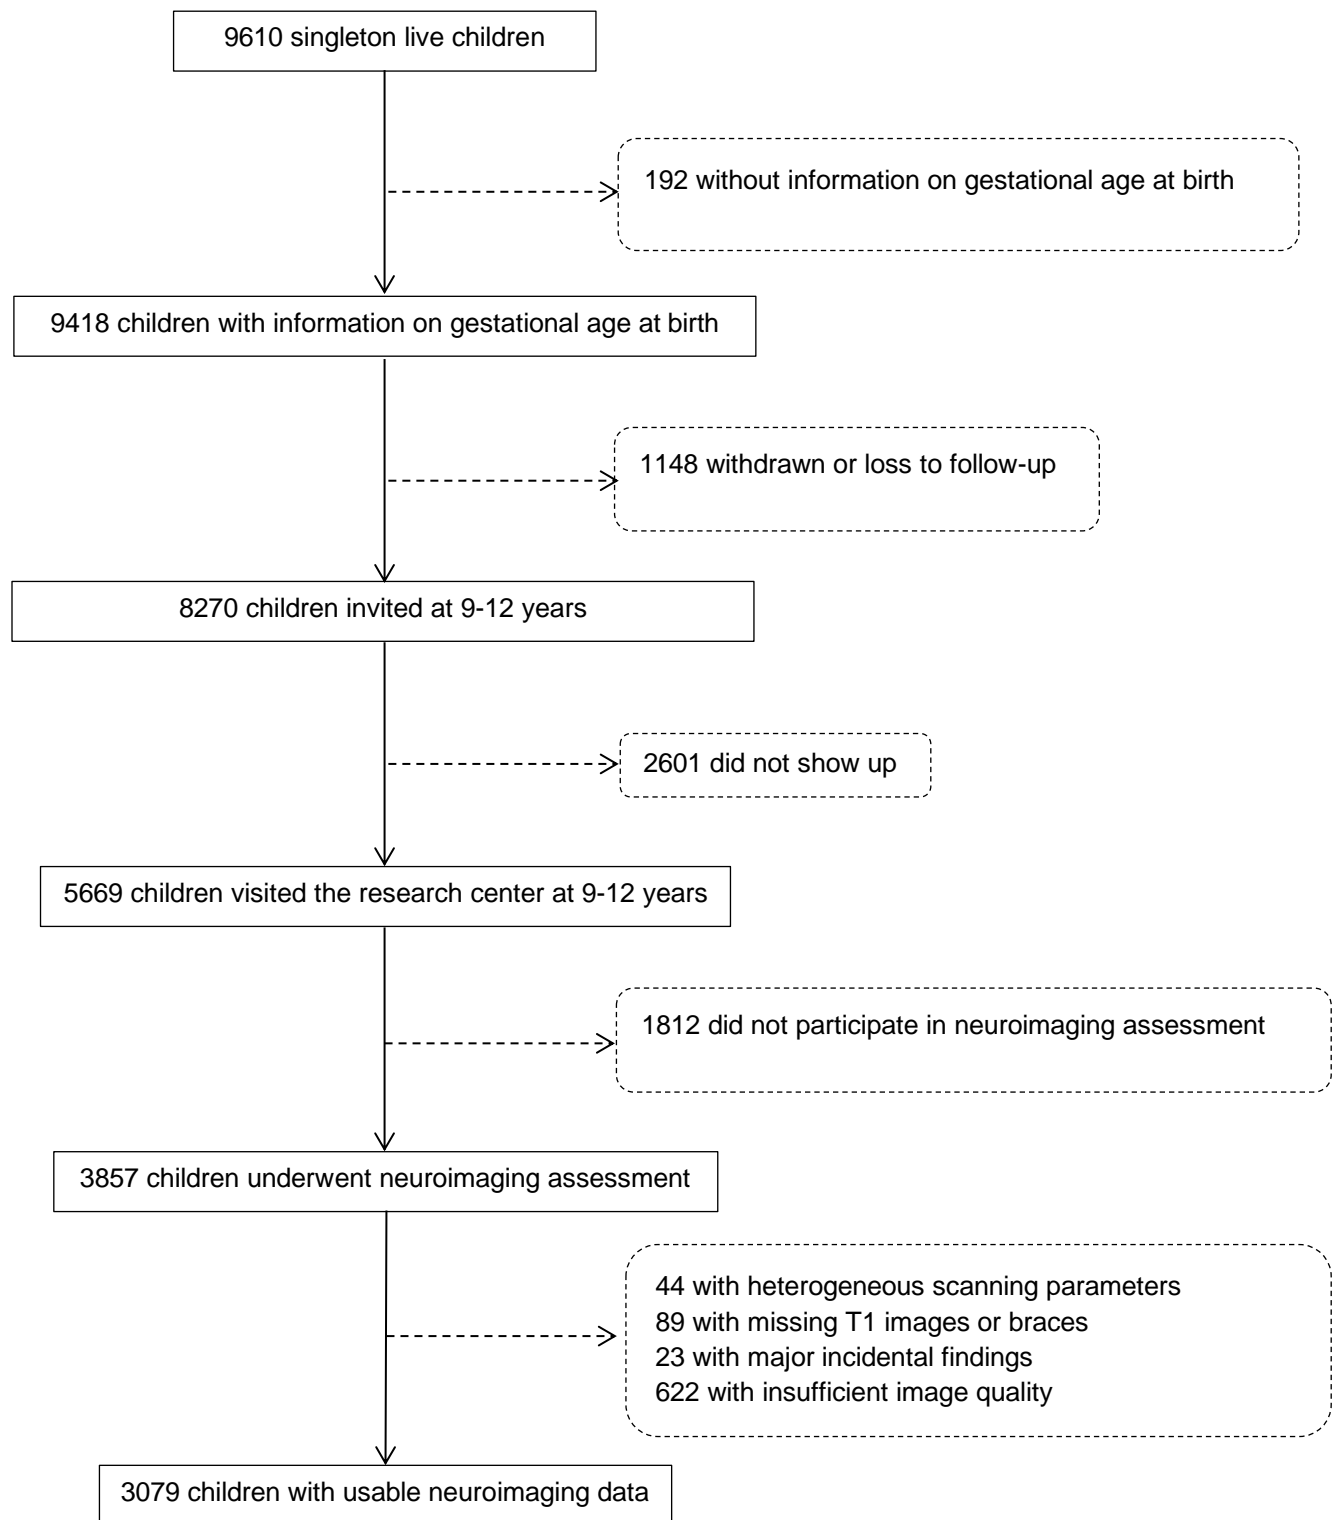

**eFigure 2. Global brain volumes in children born early term, full term and late term**

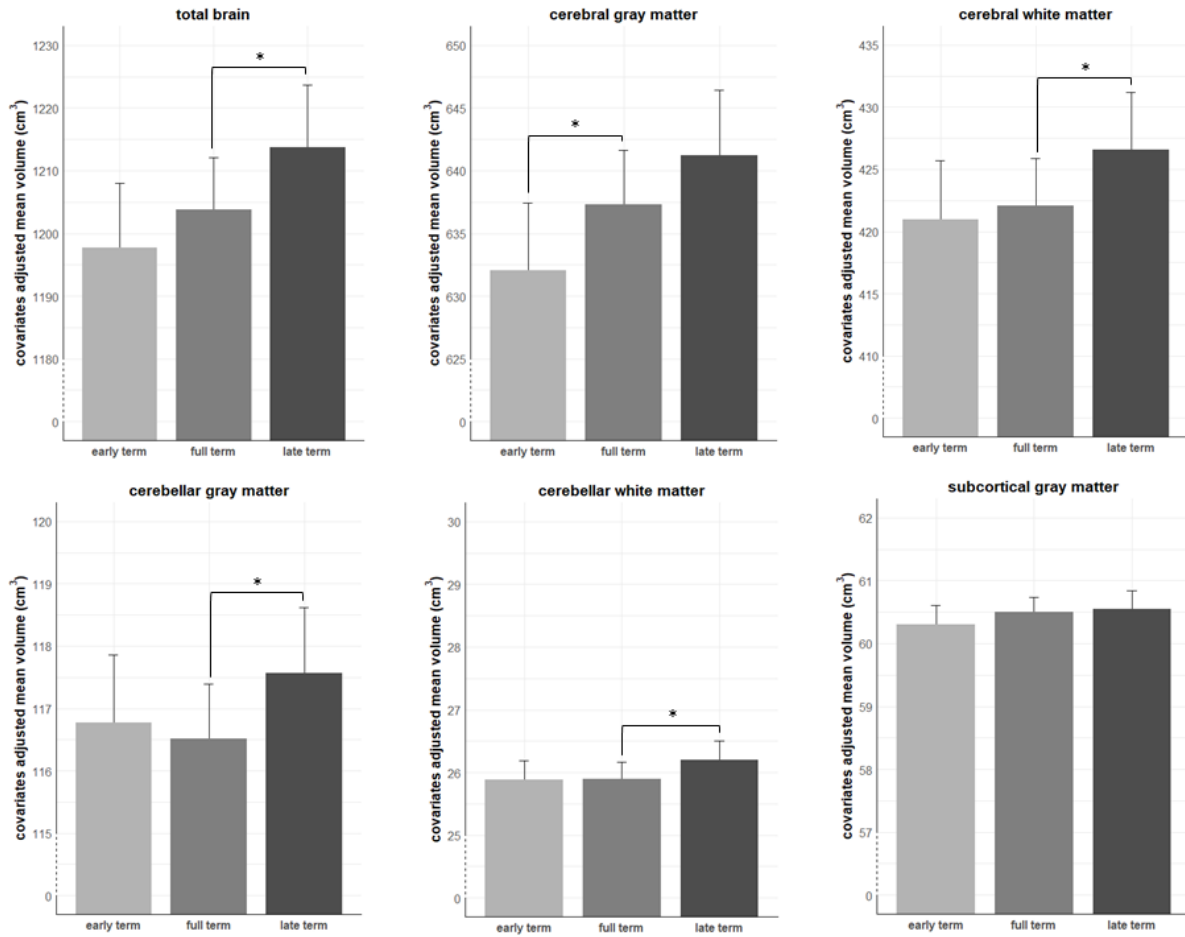

eFigure 2 legend: Brain volumes of children born at term ( $n=2718$ ) are represented in three subgroups (early term,  $n=506$ ; full term,  $n=1599$ ; and late term,  $n=613$ ). Early term are births occurring between 37 weeks 0 days and 38 weeks 6 days; full term children are those at 39 weeks 0 day through 40 weeks 6 days; late term refers to those at 41 weeks 0 day through 41 weeks 6 days. Covariates including child sex, age at MRI scan, maternal ethnicity, age at intake, marital status, educational level, psychopathology during pregnancy, smoking and alcohol use during pregnancy, and family income were adjusted. The model with subcortical gray matter as the outcome was additionally adjusted for intracranial volume. Statistical differences as indicated by the \*  $p < .05$  are comparisons of the three groups with children born full term as the reference.

**eFigure 3. Linear relationship between gestational age at birth and total brain volumes in children with heatmap**

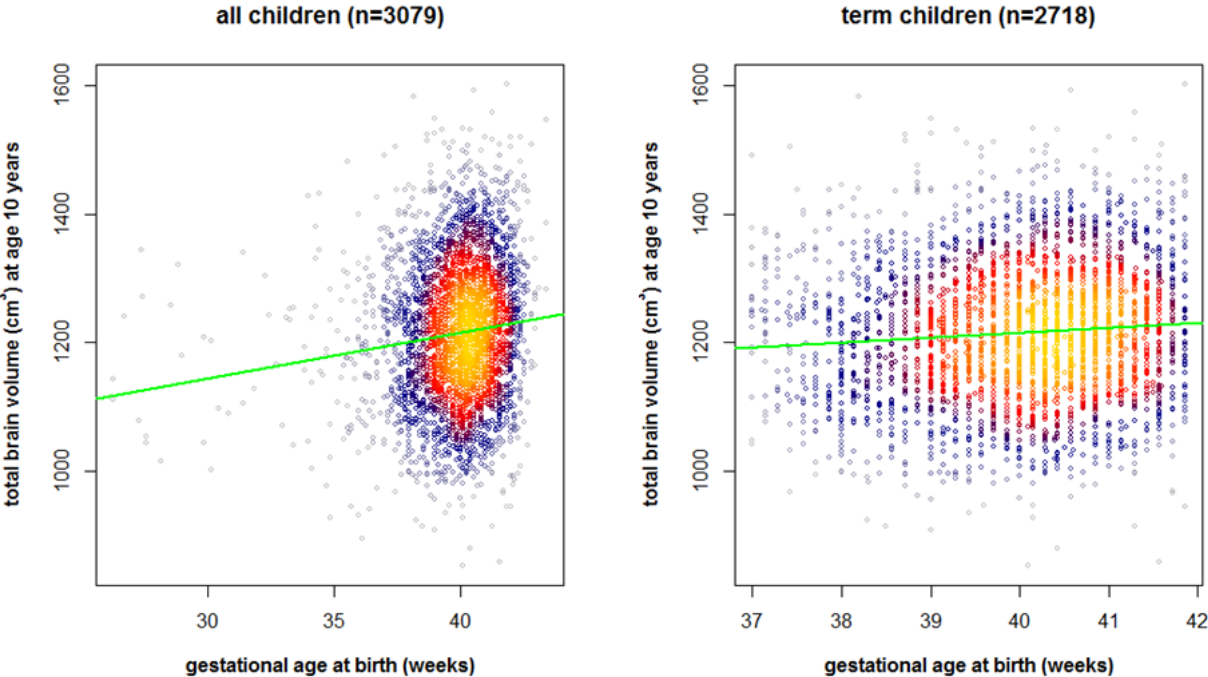

**eFigure S3 legend: Linear relationship between gestational age at birth and total brain volume in all children (left, n=3079) and children born at term (right, n=2718) at 10 years visualized with an additional heatmap.**

**eFigure 4. The association of gestational age at birth with subcortical gray matter volumes in children**

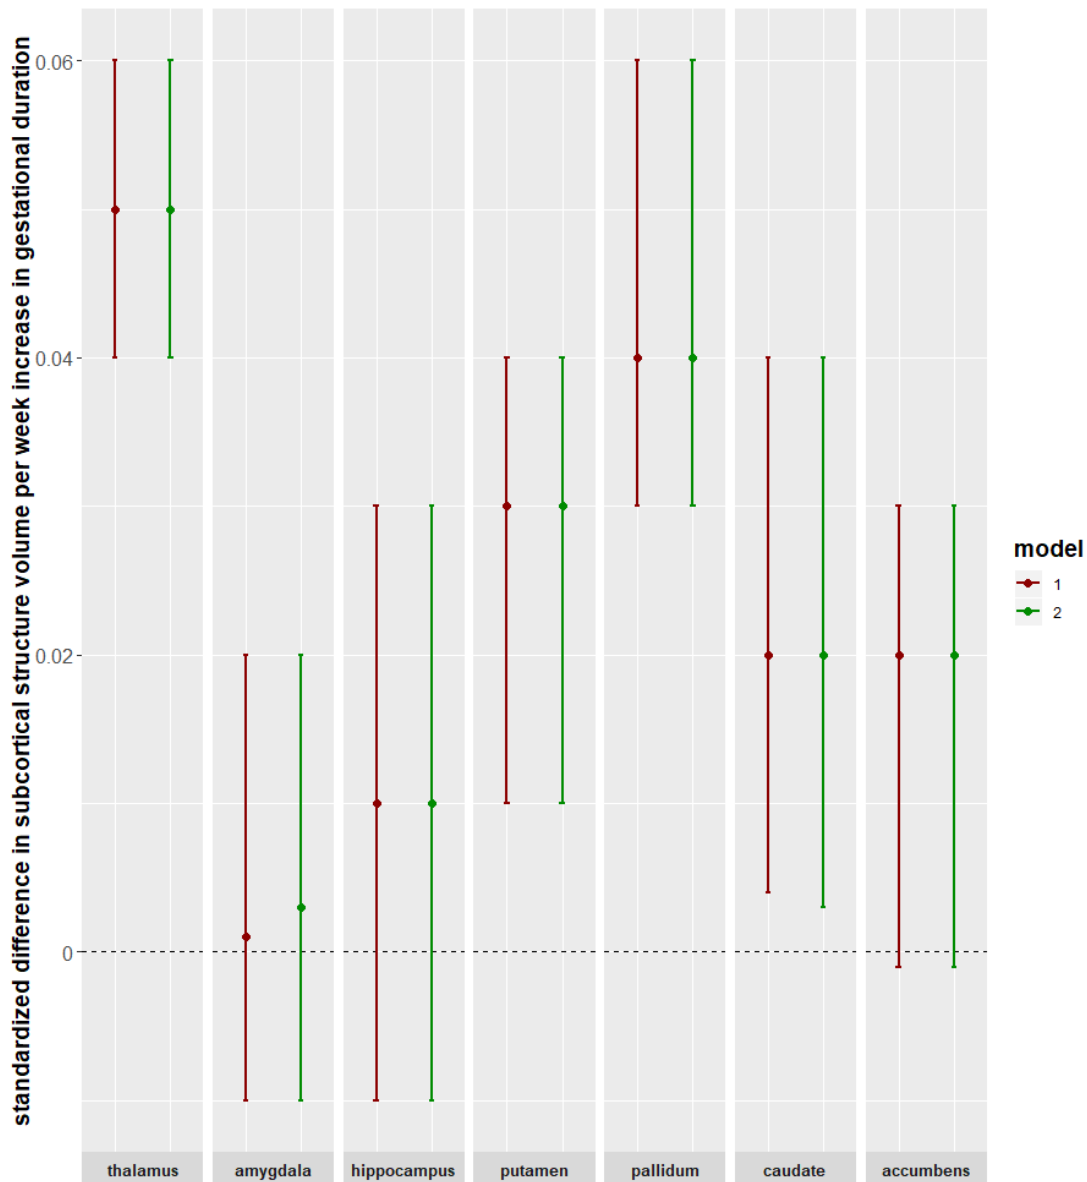

eFigure 4 legend: Estimated differences (with 95% confidence intervals) in subcortical gray matter structures (in standardized z-scores) per week increase in gestational age at birth, these were computed using regression analyses in n=3079 children. Model 1 was a minimally adjusted model, corrected for child sex, age at the neuroimaging assessment, and intracranial volume. Model 2 was a fully adjusted model, corrected for child sex, age at the neuroimaging assessment, and intracranial volume, maternal ethnicity, age at intake, marital status, educational level, psychopathology during pregnancy, smoking and alcohol use during pregnancy, and family income.

**eTable 1. Gestational age at birth and brain volumes at 10 years: interaction of GA with sex**

| Global brain volumes      | statistics of GAB × sex (interaction term) |             |         |
|---------------------------|--------------------------------------------|-------------|---------|
|                           | difference                                 | 95% CI      | p-value |
| Total brain               | 0.3                                        | -3.3 to 3.9 | .88     |
| Cerebral gray matter      | 0.3                                        | -1.6 to 2.2 | .74     |
| Cerebral white matter     | 0.1                                        | -1.5 to 1.8 | .89     |
| Cerebellar gray matter    | -0.2                                       | -0.6 to 0.2 | .37     |
| Cerebellar white matter   | 0.003                                      | -0.1 to 0.1 | .96     |
| Subcortical gray matter * | 0.01                                       | -0.1 to 0.1 | .85     |

The linear regression model examined the association of gestational age at birth (GAB) and global brain volumes in n=3079, in combination with an interaction term of GAB and sex. The model was adjusted for child sex and age at MRI scan, maternal ethnicity, age at intake, marital status, educational level, psychopathology during pregnancy, smoking and alcohol use during pregnancy, and family income.  
 \* Intracranial volume was additionally adjusted for.

**eTable 2. Gestational age at birth and cortical morphology at 10 years: surface-based clusters in all children**

| Cortical surface metric | Brain region #                   | Size brain region (mm <sup>2</sup> ) | Talairach coordinates |       |       | Cluster-wise p-value |
|-------------------------|----------------------------------|--------------------------------------|-----------------------|-------|-------|----------------------|
|                         |                                  |                                      | X                     | Y     | Z     |                      |
| <b>Thickness</b>        | Left superior temporal           | 446.2                                | -45.7                 | 6.2   | -22.3 | .0001                |
|                         | Left superior frontal            | 404.0                                | -12.5                 | 53.9  | 4.2   | .0001                |
|                         | Left cuneus                      | 230.0                                | -5.8                  | -96.7 | 11.5  | .003                 |
|                         | Right superior temporal          | 371.7                                | 46.6                  | 12.1  | -27.1 | .0001                |
|                         | Right inferior parietal          | 171.0                                | 33.2                  | -68.8 | 26.6  | .02                  |
|                         |                                  |                                      |                       |       |       |                      |
| <b>Surface area</b>     | Left post central                | 5831.4                               | -58.1                 | -17.4 | 19.3  | .0001                |
|                         | Left inferior parietal           | 3132.5                               | -32.9                 | -76.5 | 21.4  | .0001                |
|                         | Left rostral anterior cingulate  | 2442.3                               | -5.3                  | 16.9  | -6.8  | .0001                |
|                         | Left middle temporal             | 2220.1                               | -60.8                 | -17.8 | -16.3 | .0001                |
|                         | Left caudal middle frontal       | 1347.2                               | -33.3                 | 11.2  | 27.2  | .0001                |
|                         | Left inferior temporal           | 937.1                                | -46.0                 | -50.6 | -12.4 | .0001                |
|                         | Left superior parietal           | 403.0                                | -16.0                 | -86.0 | 36.5  | .007                 |
|                         | Right middle temporal            | 16130.7                              | 57.8                  | -16.1 | -17.7 | .0001                |
|                         | Right inferior parietal          | 5130.1                               | 34.3                  | -71.5 | 23.9  | .0001                |
|                         | Right fusiform                   | 1176.6                               | 39.5                  | -65.3 | -15.6 | .0001                |
|                         | Right rostral anterior cingulate | 866.8                                | 5.4                   | 19.6  | -7.2  | .0001                |
|                         | Right lateral orbitofrontal      | 457.5                                | 41.1                  | 26.3  | -14.6 | .004                 |
|                         | Right medial orbitofrontal       | 320.0                                | 8.7                   | 61.5  | -4.6  | .02                  |
|                         |                                  |                                      |                       |       |       |                      |
| <b>Gyrification</b>     | Left superior parietal           | 27509.9                              | -14.6                 | -86.2 | 36.0  | .0001                |
|                         | Left post central                | 11987.8                              | -46.7                 | -11.8 | 17.6  | .0001                |
|                         | Left fusiform                    | 642.5                                | -40.6                 | -55.4 | -14.2 | .002                 |
|                         | Right insula                     | 35998.0                              | 37.9                  | -13.7 | 21.5  | .0001                |
|                         | Right rostral anterior cingulate | 4780.7                               | 10.2                  | 40.2  | 4.8   | .0001                |

# Brain regions represent colored areas in Figure 2A, 2B and 2C.

A surface-based analysis was performed in n=3065 children. The model was adjusted for child sex, age at MRI scan, maternal ethnicity, age at intake, marital status, educational level, psychopathology during pregnancy, smoking and alcohol use during pregnancy, and family income. The list of clusters represent brain regions of surface-based metrics that were associated with gestational age at birth, which survived the cluster-wise correction for multiple comparisons.

**eTable 3. Gestational age at birth and cortical morphology at 10 years: surface-based clusters in children born at term**

| Cortical surface metric | Brain region #             | Size brain region (mm <sup>2</sup> ) | Talairach coordinates |       |       | Cluster-wise p-value |
|-------------------------|----------------------------|--------------------------------------|-----------------------|-------|-------|----------------------|
|                         |                            |                                      | X                     | Y     | Z     |                      |
| <b>Thickness</b>        | Left superior temporal     | 242.3                                | -41.4                 | 8.4   | -27.5 | .003                 |
| <b>Surface area</b>     | Left inferior parietal     | 1995.7                               | -30.8                 | -70.7 | 29.2  | .0001                |
|                         | Left lateral orbitofrontal | 865.1                                | -11.5                 | 58.3  | -17.6 | .0001                |
|                         | Left middle temporal       | 419.4                                | -61.9                 | -35.9 | -14.1 | .006                 |
|                         | Left caudal middle frontal | 345.6                                | -35.2                 | 14.2  | 30.2  | .01                  |
|                         | Left inferior temporal     | 342.8                                | -51.4                 | -42.9 | -24.0 | .02                  |
|                         | Right superior frontal     | 2270.4                               | 19.4                  | 16.8  | 58.2  | .0001                |
|                         | Right superior temporal    | 820.6                                | 52.6                  | -26.7 | -0.7  | .0001                |
|                         | Right frontal pole         | 781.9                                | 7.8                   | 63.7  | -5.9  | .0001                |
|                         | Right middle temporal      | 672.1                                | 63.0                  | -12.4 | -18.5 | .0002                |
|                         | Right pars opercularis     | 535.9                                | 50.4                  | 8.7   | 1.5   | .001                 |
|                         | Right superior parietal    | 458.4                                | 10.4                  | -84.2 | 37.0  | .004                 |
|                         | Right superior parietal    | 308.1                                | 30.8                  | -59.0 | 45.2  | .02                  |
| <b>Gyrification</b>     | Left precuneus             | 8230.8                               | -7.7                  | -51.2 | 52.5  | .0001                |
|                         | Left post central          | 4942.1                               | -40.8                 | -15.9 | 20.7  | .0001                |
|                         | Left superior frontal      | 4024.7                               | -14.3                 | 46.5  | 2.0   | .0001                |
|                         | Left inferior parietal     | 1138.2                               | -45.3                 | -75.9 | 12.5  | .0001                |
|                         | Left supra marginal        | 913.1                                | -56.3                 | -52.9 | 18.0  | .0001                |
|                         | Left fusiform              | 501.0                                | -39.4                 | -45.1 | -19.0 | .005                 |
|                         | Right superior parietal    | 9412.3                               | 24.3                  | -74.1 | 39.9  | .0001                |
|                         | Right insula               | 8625.0                               | 36.7                  | -27.0 | 6.2   | .0001                |
|                         | Right medial orbitofrontal | 3335.2                               | 9.3                   | 56.5  | -3.3  | .0001                |

## Brain regions represent colored areas in Figure 3A, 3B and 3C.

A surface-based analysis was performed in 2706 children born at term. The model was adjusted for child sex, age at MRI scan, maternal ethnicity, age at intake, marital status, educational level, psychopathology during pregnancy, smoking and alcohol use during pregnancy, and family income. The list of clusters represent brain regions of surface-based metrics that were associated with gestational age at birth, which survived the cluster-wise correction for multiple comparisons.



**eTable 4. The association of gestational age at birth in categories with global brain volumes**

|           |         | N    | Total brain volume            |                |                    | Cerebral gray matter volume    |                |                    | Cerebral white matter volume    |               |                    |
|-----------|---------|------|-------------------------------|----------------|--------------------|--------------------------------|----------------|--------------------|---------------------------------|---------------|--------------------|
|           |         |      | difference                    | 95% CI         | P-value            | difference                     | 95% CI         | P-value            | difference                      | 95% CI        | P-value            |
| Term      | Model 1 | 2718 | ref                           | -              | -                  | ref                            | -              | -                  | ref                             | -             | -                  |
| Preterm   |         | 138  | -35.4                         | -51.6 to -19.1 | <.001              | -22.1                          | -30.7 to -13.5 | <.001              | -8.8                            | -16.1 to -1.4 | .02                |
| Post-term |         | 223  | 15.0                          | 2.0 to 28.0    | .02                | 10.2                           | 3.3 to 17.0    | .004               | 3.3                             | -2.6 to 9.1   | .28                |
| Term      | Model 2 | 2718 | ref                           | -              | -                  | ref                            | -              | -                  | ref                             | -             | -                  |
| Preterm   |         | 138  | -26.5                         | -42.1 to -11.0 | <.001 <sup>#</sup> | -17.3                          | -25.5 to -9.1  | <.001 <sup>#</sup> | -5.8                            | -12.9 to 1.4  | .12                |
| Post-term |         | 223  | 10.5                          | -1.9 to 22.8   | .10                | 7.7                            | 1.2 to 14.2    | .02 <sup>#</sup>   | 1.6                             | -4.1 to 7.3   | .58                |
|           |         | N    | Cerebellar gray matter volume |                |                    | Cerebellar white matter volume |                |                    | Subcortical gray matter volume* |               |                    |
|           |         |      | difference                    | 95% CI         | P-value            | difference                     | 95% CI         | P-value            | difference                      | 95% CI        | P-value            |
| Term      | Model 1 | 2718 | ref                           | -              | -                  | ref                            | -              | -                  | ref                             | -             | -                  |
| Preterm   |         | 138  | -3.5                          | -5.3 to -1.8   | <.001              | -0.9                           | -1.3 to -0.4   | <.001              | -0.8                            | -1.3 to -0.4  | <.001              |
| Post-term |         | 223  | 1.1                           | -0.3 to 2.5    | .12                | 0.4                            | 0.03 to 0.8    | .03                | 0.7                             | 0.3 to 1.0    | <.001              |
| Term      | Model 2 | 2718 | ref                           | -              | -                  | ref                            | -              | -                  | ref                             | -             | -                  |
| Preterm   |         | 138  | -2.6                          | -4.3 to -1.0   | .002 <sup>#</sup>  | -0.8                           | -1.2 to -0.3   | .002 <sup>#</sup>  | -0.8                            | -1.3 to -0.4  | <.001 <sup>#</sup> |
| Post-term |         | 223  | 0.7                           | -0.6 to 2.0    | .31                | 0.4                            | -0.01 to 0.7   | .06                | 0.7                             | 0.3 to 1.0    | <.001 <sup>#</sup> |

In the results of these regression models, the effect estimates represent the difference in cm<sup>3</sup> for brain volumes in preterm or post-term born children compared to term born children. Model 1 is a minimally adjusted model corrected for child sex and age at the neuroimaging assessment. Model 2 is a fully adjusted mode, corrected for child sex and age at the neuroimaging assessment, maternal ethnicity, age at intake, marital status, educational level, psychopathology, smoking and alcohol use during pregnancy, and family income.

\* Intracranial volume was additionally adjusted for in both models.

# The associations survived a false discovery rate correction for multiple testing (applied to model 2 only).

**eTable 5: Comparison of linear and non-linear (quadratic and natural cubic spline) models using the likelihood ratio test**

| Global brain volumes     | All children (N=3079) |           |                       | Term children (N=2718) |           |                       |
|--------------------------|-----------------------|-----------|-----------------------|------------------------|-----------|-----------------------|
|                          | Linear                | Quadratic | Natural cubic splines | Linear                 | Quadratic | Natural cubic splines |
|                          | reference             | p-value   | p-value               | reference              | p-value   | p-value               |
| Total brain              | -                     | .33       | .31                   | -                      | .25       | .31                   |
| Cerebral gray matter     | -                     | .17       | .16                   | -                      | .50       | .63                   |
| Cerebral white matter    | -                     | .52       | .50                   | -                      | .23       | .26                   |
| Cerebellar gray matter   | -                     | .90       | .86                   | -                      | .06       | .06                   |
| Cerebellar white matter  | -                     | .26       | .27                   | -                      | .26       | .23                   |
| Subcortical gray matter* | -                     | .84       | .75                   | -                      | .90       | .86                   |

In all children (n=3079) and children born at term (n=2718), non-linear models with a quadratic term or natural cubic splines were compared to linear models using likelihood ratio test. P-value <.05 would have suggested improved model fit of the non-linear models. For the natural cubic splines model the knot was set at 37 weeks (for all children) or 40 weeks (for term children). All models were corrected for child sex and age at the neuroimaging assessment, maternal ethnicity, age at intake, marital status, educational level, psychopathology, smoking and alcohol use during pregnancy, and family income.

\* Intracranial volume was additionally adjusted for.

**eTable 6. Non-response analysis**

|                                                        | Respondents<br>(n=3079) <sup>a</sup> | Non-respondents<br>(n=6339) | P-value |
|--------------------------------------------------------|--------------------------------------|-----------------------------|---------|
| <b>Maternal characteristics</b>                        |                                      |                             |         |
| Age at intake, mean (sd), y                            | 31.1 (4.9)                           | 29.3 (5.5)                  | <.001   |
| Multiparous (%)                                        | 11.8                                 | 16.3                        | <.001   |
| Pregnancy complications (%) <sup>b</sup>               | 6.4                                  | 7.3                         | .14     |
| Ethnicity (%)                                          |                                      |                             |         |
| <i>Dutch</i>                                           | 57.5                                 | 46.0                        | <.001   |
| <i>Non-Dutch Western</i>                               | 12.2                                 | 11.1                        |         |
| <i>Non-Dutch Non-Western</i>                           | 30.3                                 | 43.0                        |         |
| Educational level (%)                                  |                                      |                             |         |
| <i>Primary or lower</i>                                | 7.2                                  | 13.8                        | <.001   |
| <i>Secondary</i>                                       | 41.1                                 | 48.8                        |         |
| <i>Higher</i>                                          | 51.7                                 | 37.4                        |         |
| Monthly household income (%)                           |                                      |                             |         |
| < €1200 (US \$1550, below social security level)       | 15.9                                 | 24.8                        | <.001   |
| €1200 to €2000 (US \$ 1550-2580)                       | 16.9                                 | 20.2                        |         |
| > €2000 (US \$ 2580, more than modal)                  | 67.2                                 | 55.1                        |         |
| Marital status, married or with partner (%)            | 88.2                                 | 83.9                        | <.001   |
| Smoking during pregnancy (%)                           |                                      |                             |         |
| <i>Never in pregnancy</i>                              | 77.3                                 | 71.3                        | <.001   |
| <i>Until pregnancy was known</i>                       | 8.6                                  | 8.3                         |         |
| <i>Continued in pregnancy</i>                          | 14.1                                 | 20.4                        |         |
| Alcohol use during pregnancy (%)                       |                                      |                             |         |
| <i>Never in pregnancy</i>                              | 40.1                                 | 52.0                        | <.001   |
| <i>Until pregnancy was known</i>                       | 13.9                                 | 12.6                        |         |
| <i>Continued in pregnancy, occasionally</i>            | 36.3                                 | 29.3                        |         |
| <i>Continued in pregnancy, frequently</i> <sup>c</sup> | 9.7                                  | 6.1                         |         |
| Psychopathology symptoms, mean (sd)                    | 0.3 (0.4)                            | 0.3 (0.4)                   | <.001   |
| <b>Birth and child characteristics</b>                 |                                      |                             |         |
| Caesarean delivery (%)                                 | 12.4                                 | 12.6                        | .96     |
| Suspected fetal distress (%)                           | 7.7                                  | 7.8                         | .88     |
| Apgar score at 5 min < 7 (%)                           | 1.1                                  | 1.4                         | .31     |
| Gestational age at birth, mean (sd), wk                | 39.9 (1.8)                           | 39.7 (2.0)                  | <.001   |
| <i>Range</i>                                           | 26.3-43.4                            | 20.9-43.7                   | -       |
| Birth weight, mean (sd), g                             | 3444.8 (554.1)                       | 3391.4 (566.9)              | <.001   |
| Male (%)                                               | 49.8                                 | 51.1                        | .25     |
| Age at MRI, mean (sd), y                               | 10.1 (0.6)                           | 10.2 (0.8)                  | .68     |

Abbreviation: MRI, magnetic resonance imaging

Non-respondents are participants with data on gestational age at baseline, but no neuroimaging data at follow-up.

P-values were derived from t-tests for or Wilcoxon tests for continuous variables and chi-square tests for categorical variables.

a. Imputed data were reported.

b. Included occurrence of preeclampsia, diabetes, and/or pregnancy induced hypertension.

c. Frequent continued alcohol use is defined as 1 or more glasses of alcohol per week in at least 2 trimesters.
